# Supplementary material
Source: PubMed Central journal article supplement (PMC3185341)
Supplement: embor2011155s1.pdf [file embor2011155s1.pdf]

**Supporting information to:**

**The mRNA export factor Npl3 mediates the export of  
large ribosomal subunits**

Alexandra Hackmann<sup>1</sup>, Thomas Gross<sup>2</sup>, Claudia Baierlein<sup>1</sup> and Heike  
Krebber\*<sup>1</sup>

*<sup>1</sup> Abteilung für Molekulare Genetik, Institut für Mikrobiologie und Genetik,  
Göttinger Zentrum für Molekulare Biowissenschaften (GZMB), Georg-August  
Universität Göttingen, Grisebachstr. 8, 37077 Göttingen, Germany*

*<sup>2</sup> Current address: Department of Genetics, Harvard Medical School, 77  
Avenue Louis Pasteur, Boston, MA 02115, USA*

\*Corresponding author. Phone: 49 551 39 3801. Fax: 49 551 39 3805. E-mail:  
heike.krebber@biologie.uni-goettingen.de

Running title: Npl3 Functions in Large Ribosomal Subunit Export

## Supplementary information

### Figure legends

**Fig. S1| Npl3 is part of the exported mRNP.** (A) Npl3 is essential in the S288C strain background. Serial dilutions of S288C *np13* $\Delta$  either with an empty vector or with *NPL3* were spotted onto –URA plates or onto FOA-plates that select for the loss of the covering plasmid and incubated at 25°C for three days. (B) Npl3 is not essential in the *BY* strain background. Serial dilutions of *BY np13* $\Delta$  were spotted onto YPD plates and incubated at 25°C or 37°C for three days. (C) Localization of an at steady state cytoplasmic mutant of *NPL3* (GFP-*np13<sub>c</sub>*), expressed in *BY*-wildtype or *-rat7-1 np13* $\Delta$  cells that were grown to the logarithmic growth before shifted to 37°C for the indicated times. The DNA was stained with DAPI. (D) Ribosomal profiles showing the incorporation of Rpl25-GFP into ribosomes. Wildtype expressing Rpl25-GFP was grown to log phase before their lysates were applied onto 5-50% sucrose density gradients, fractionated and analyzed in flow through photometry. The fractions are shown in western blot analyses with antibodies against GFP (top). The same experiment was performed with the addition of RNase, which destroys the polysomes (bottom).

**Fig. S2| *np13* $\Delta$  has no obvious nucleolar export defects and rRNA processing defects.** (A) Rpl25-GFP does not accumulate in the nucleolus. Co-localization experiments of the nuclear localization of Rpl25-GFP in *np13* $\Delta$  with the DAPI staining and an immunofluorescence with antibodies against the nucleolar protein Nop1 are shown in log phase cells shifted to 37°C for 30 min. (B/C) *np13* $\Delta$  cells have no obvious rRNA processing defects. Total RNA was extracted from wildtype and *np13* $\Delta$  and examined by the Bio-Rad Experion™. (B) rRNA bands in a virtual gel image and electropherograms (C) are shown. The RNA quality was assessed by RQI (RNA quality indicator) values as well as the ratios between the 25S and 18S rRNA peaks (=rRNA ratio).

**Fig. S3| The export of the small ribosomal subunit is independent of Npl3.** (A) Localization of the small ribosomal subunit reporter protein Rps2-GFP is shown in wildtype, *npl3* $\Delta$  and *xpo1-1* in the *BY*-strain background at 25°C and upon temperature shift to 37°C for the indicated times. (B) A novel assay tracking single 18S rRNA molecules reveal no export defects for the small ribosomal subunit in *npl3* $\Delta$ . Localization of the DIG-UTP labeled 18S rRNA is shown in *in situ* hybridization experiments in wildtype, *npl3* $\Delta$ , *nmd3-2*, *mtr2-33*, *xpo1-1* and *rat7-1* in the *BY*-strain background at 25°C and upon temperature shift to 37°C for the indicated times.

**Fig. S4| Interaction of Npl3 with the large ribosomal subunit is not RNase sensitive and not restricted to the *BY*-strain background.** (A) The interaction between Npl3 and Rpl25 shown in Fig 3A is not RNase sensitive in contrast to the interaction between Dbp5 and Pab1 shown here. Co-immunoprecipitations with Pab1-GFP were performed with Dbp5-myc. (B) Ethidiumbromide stained rRNA is shown on a 1.5% agarose gel, prepared from the lysates treated with or without RNase. (C) Co-immunoprecipitations of Npl3 were performed with GFP-tagged Rpl25 in *S288C*. Total lysates were split and incubated with or without RNase prior to elution. Western blot analyses with antibodies against GFP, Npl3 and Hem15 are shown.

**Fig. S5| Npl3 interacts with FG-repeats.** 10% Coomassie stained SDS-gel showing GST-pull downs of a GST-tagged GLFG-repeat domain of Nup116 with recombinantly expressed and purified Npl3 in the presence of competitive bacterial lysate.

**Fig. S6| Model describing the transport functions of Npl3.** mRNA export: Npl3 binds to the mRNA in the nucleus and recruits the heterodimer Mex67-Mtr2 for mRNA export. In this way Npl3 acts as an adapter for the export receptor heterodimer. Mex67-Mtr2 contacts the nuclear pore complex (NPC) during transit. Pre-60S ribosomal subunit export: For the export of the pre-60S ribosomal subunit Npl3 directly interacts with the 25S rRNA and Rpl25 on the

one side and with the NPC on the other side. In this way, Npl3 functions without Mex67 and acts rather as a receptor as it is able to directly interact with the NPC. Other pre-60S export receptors and their adapters such as Xpo1-Nmd3 and Mex67-Mtr2 interact with the pre-60S particle on their own. All three transporters together with auxiliary transport factors (not shown) act in concert to mediate the export of this large ribonucleoparticle (RNP).

Figure S1

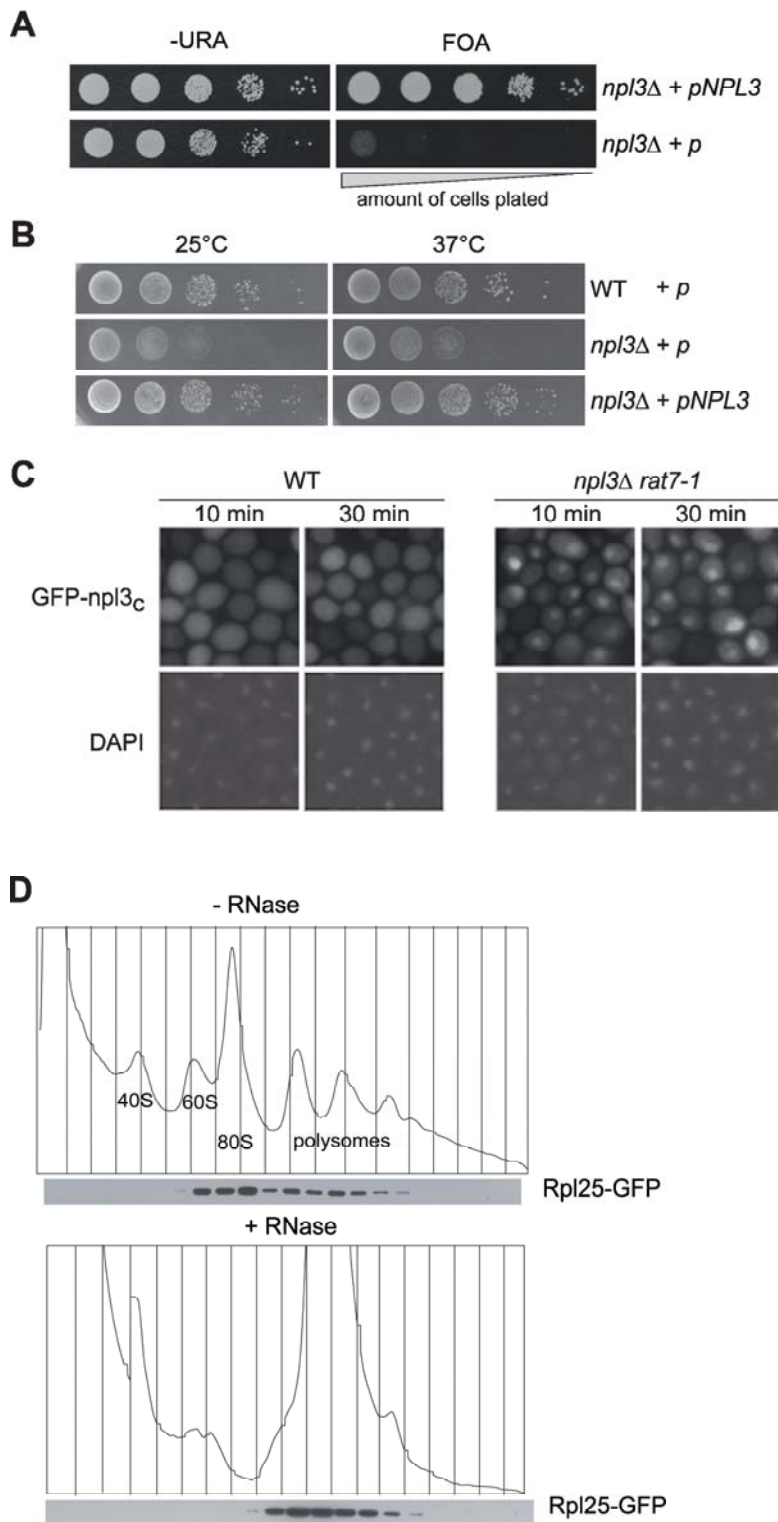

Figure S2

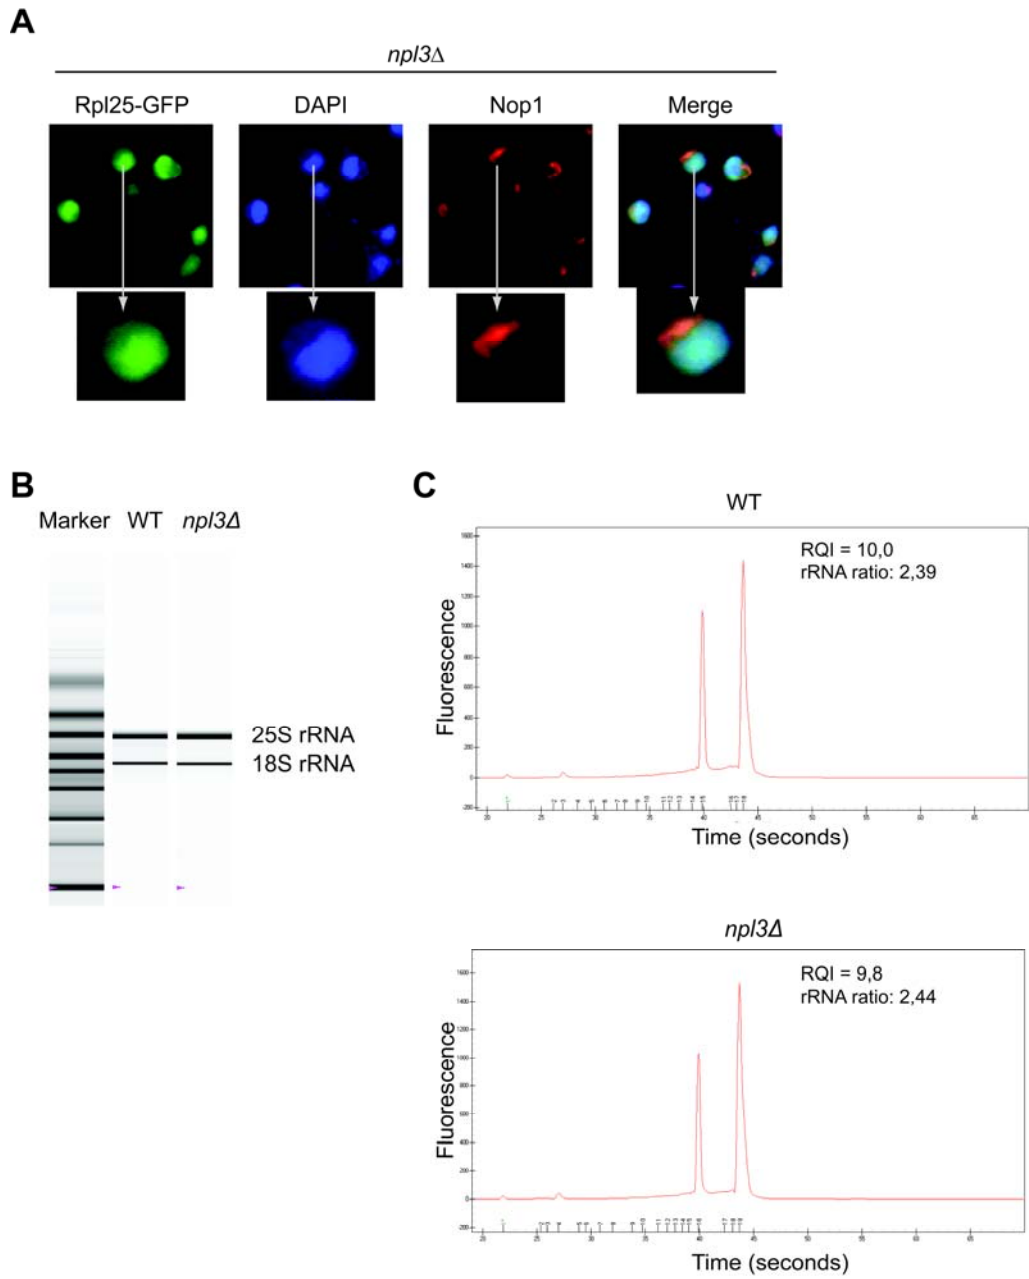

Figure S3

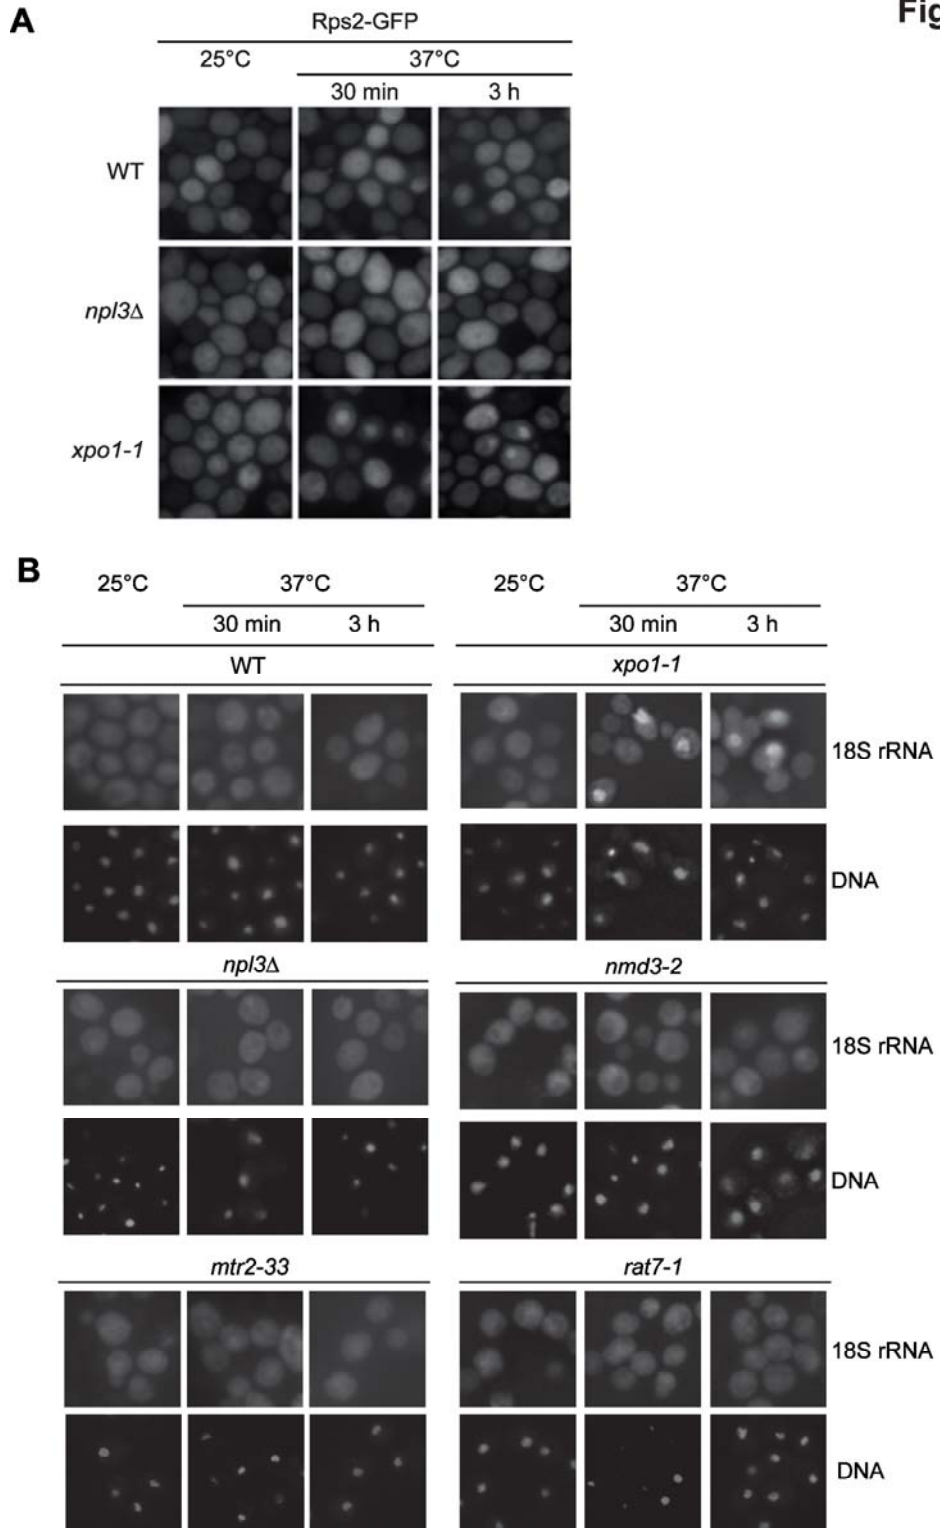

**Figure S4**

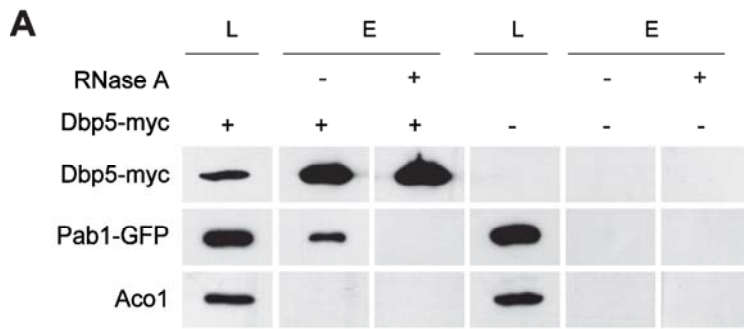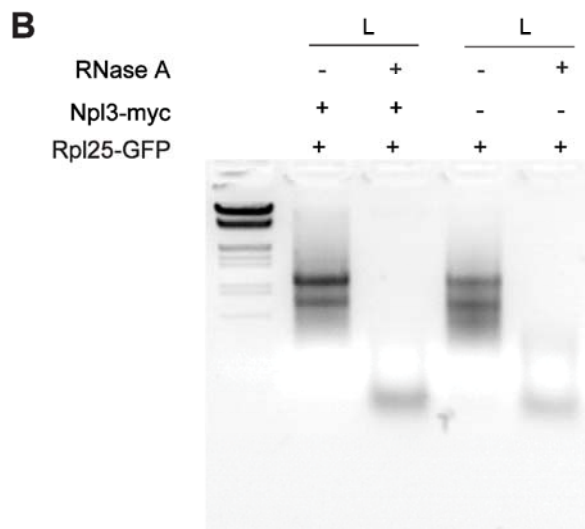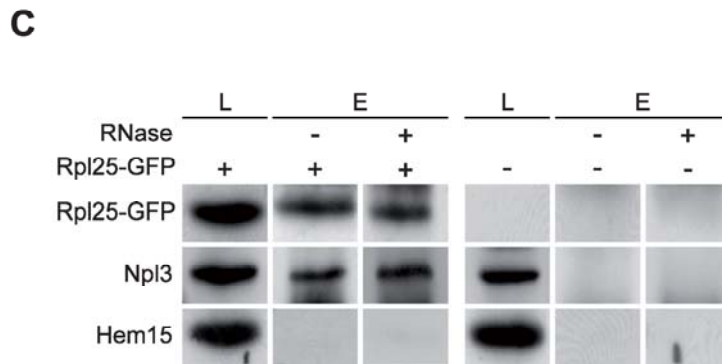



Figure S5

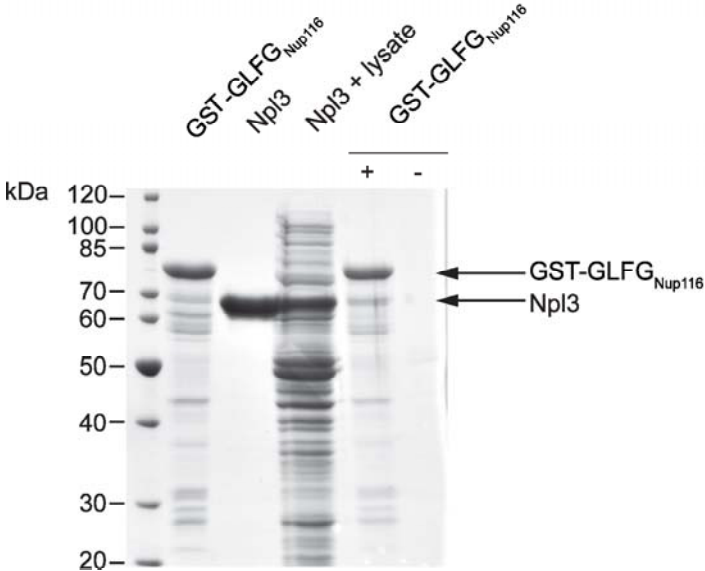

Figure S6

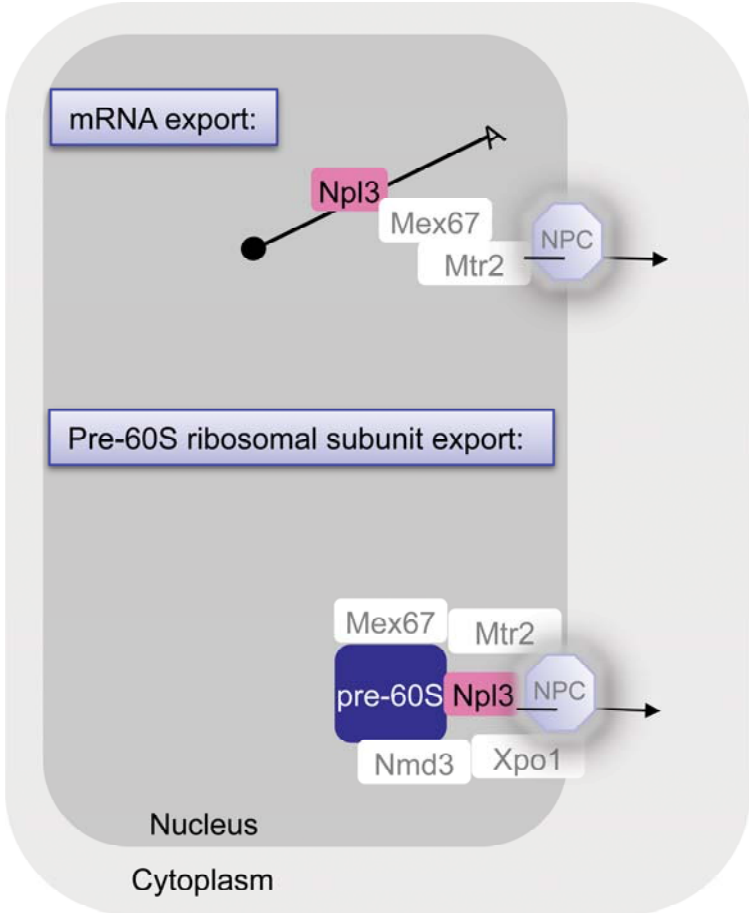

## ADDITIONAL METHODS

**Yeast Strains, Plasmids and Oligonucleotides.** All yeast strains used in this study are listed in the Supplemental Table 1, plasmids are listed in Table 2 and oligonucleotides in Table 3. All experiments unless indicated differently were performed in the *BY-series* of the *Saccharomyces cerevisiae* strain background (Brachmann et al., 1998) that was used in the deletion project ([http://sequence-www.stanford.edu/group/yeast\\_deletion\\_project/deletions3.html](http://sequence-www.stanford.edu/group/yeast_deletion_project/deletions3.html)) and that is listed in the *Saccharomyces* genome database, SGD (<http://www.yeastgenome.org/>). Strains were cultivated in standard media at 25°C. All growth tests are shown in 10-fold serial dilution starting with approximately  $10^5$  cells per drop.

### Construction of plasmids and yeast strains

#### *Construction of genomic RPL25-myc*

Construction of the genomic *myc*-tagged *RPL25* was done according to Knop et al. (1999). The *myc*-insertion cassette was amplified by PCR with the primer set HK495 and HK496 from pHK492 and yeast cells were transformed with the PCR product. Correct integration was verified by PCR amplification of genomic DNA and Rpl25-*myc* protein expression.

#### *Construction of plasmid encoded GFP-NPL3 (pHK765)*

*P<sub>Npl3</sub>GFP-NPL3* was excised from pHK418 with *NotI/SalI* and inserted into *NotI/SalI* restricted pHK88.

#### *Construction of plasmid encoded 9 x myc-NPL3 (pHK778)*

*StuI* restricted PCR of pHK493 with primer set HK553 and HK554 was ligated into *StuI* digested pHK418

#### *Construction of the recombinant NPL3 expression plasmid*

Coding sequences for the ORF of *NPL3* from pHK26 was PCR-amplified (HK181, HK652) and cloned via the TOPO TA cloning kit (Invitrogen) and *Bam*HI digestion into pET-15b resulting in a His-tagged *NPL3* (pHK845).

## **GFP Fluorescence**

All light microscopy studies were performed with a Leica AF6000 microscope and pictures were obtained by using the Hamamatsu 1394 ORCA-ERA camera and the LAS AF 1.6.2 software (Leica). Export of ribosomal subunits by using the *RPL25-GFP* and *RPS2-GFP* reporter constructs were analyzed according to (Gadal et al., 2001; Milkereit et al., 2001). Localization studies of npl3-RA8-GFP (GFP-npl3<sub>c</sub>) were performed according to (Gilbert et al., 2001a). For immunofluorescence studies, yeast cells were grown at 25°C in the appropriate medium to the log phase ( $1-3 \times 10^7$  cells/ml). If indicated a temperature shift to 37°C was done, before the cells were treated as described in (Krebber et al., 1999b). The Nop1-antibody was used in a 1:250 dilution.

## **Co-immunoprecipitation experiments**

Cells were grown at 25°C to a density of OD<sub>600</sub> 0.5-0.8 in the appropriate SD medium. If indicated a temperature shift to 37°C was done before 100-200 OD<sub>600</sub> of the cells were collected, washed once in ddH<sub>2</sub>O and resuspended in 600 µl of PBSMKT-buffer (137 mM NaCl, 5.7 mM KCl, 10 mM Na<sub>2</sub>HPO<sub>4</sub>, 2 mM KH<sub>2</sub>PO<sub>4</sub>, 2.5 mM MgCl<sub>2</sub>, 0.05-0.5% (v/v) Triton X-100). Yeast cells were transferred to microcentrifuge tubes, one cell volume of glass beads and protease inhibitor cocktail (Sigma-Aldrich (Nr. P8215) and Roche Applied Science (Nr. 11873580001)) were added, and the cells were lysed by vigorous vortexing for 20 sec and 4.5 m/s using FastPrep®-24 (MP Biomedicals). After spinning for 5 min at 16.000 x g, the clarified supernatants were either directly used or split into two equal portions (+/- addition of RNase A) if indicated and incubated for 2-4 h at 4°C with gentle agitation either with 10 µl of Protein G sepharose beads (Amersham Biosciences) or with 20 µl Protein G agarose beads (Santa Cruz), conjugated to monoclonal c-myc (9E10)- or polyclonal GFP-specific antibodies. In the RNase containing samples the enzyme was added to the PBSMKT-buffer to a final concentration of 200 µg/ml. The beads were washed five times with 1 ml PBSMKT-buffer by repeated low speed centrifugation (600 x g). Samples of the lysates, the final washes and the eluates were mixed with 2 x SDS sample loading buffer and separated on 10-15% (w/v) SDS-PAGEs.

### **Purification of recombinant proteins**

Recombinant proteins were expressed in *E. coli* (BL21 DE3). Cells were induced with 1 mM IPTG for 4 h at 37°C. All following steps were done on ice or 4°C.

Cells expressing His-Npl3 were lysed in binding buffer (150 mM NaCl, 30 mM HEPES, 5% glycerol, 2 mM  $\beta$ -mercaptoethanol, 20 mM imidazole; adjusted to pH8.0) and after spinning for 30 min at 20000 x g, the lysate was filtered by a syringe filter and loaded onto a HisTrap FF column (Ni Sepharose 6 Fast Flow from GE Healthcare). The whole purification was done with an ÄKTAprime<sup>TM</sup>plus (GE Healthcare). After binding to the column it was washed with binding buffer and finally the protein was eluted with elution buffer (150 mM NaCl, 30 mM HEPES, 5% glycerol, 2 mM  $\beta$ -mercaptoethanol, 500 mM imidazole; adjusted to pH8.0). Protein size and potential contaminations were controlled by SDS gel electrophoresis. The eluted His-Npl3 was dialysed against a storage buffer (150 mM NaCl, 20 mM HEPES pH7.5, 5% glycerol, 2 mM DTT) and concentrated via Vivaspin ultrafiltration spin columns (Sartorius). Aliquots were stored at -80°C.

Cells expressing GST-GLFG<sub>Nup116</sub> were lysed in PBS buffer (pH7.3) plus 2 mM DTT and 1 mM PMSF, using a fluidizer (Microfluidics). After centrifugation and syringe filtration the lysate was loaded onto a GSTrap (FF) column (GE Healthcare). Purification was performed on an ÄKTAprime<sup>TM</sup> (GE Healthcare) at flow rate of 1ml/min. After loading, the column was washed with four column volume of PBS pH7.3 plus 2 mM DTT and 10 mM PMSF. The GST-protein was eluted with elution buffer (PBS pH7.3, 2 mM DTT, 30 mM reduced glutathione). The eluted GST-GLFG<sub>Nup116</sub> fractions were pooled and dialyzed against storage buffer. Aliquots were stored at -80°C.

### ***In vitro* RNA co-immunoprecipitation experiments**

Recombinant His-Npl3 was equilibrated with RNA-binding buffer (25 mM Tris-HCl pH 7.4, 100 mM KCl, 0,2% (v/v) Triton X-100, 0,2 mM PMSF, 5 mM DTT, 10 units RiboLock<sup>TM</sup> RNase Inhibitor (Fermentas)) and incubated with fragments of the 25S, 5.8S or 18S rRNAs. *In vitro* transcription of rRNA

fragments was performed using purified PCR products, which were generated by PCR amplification of rDNA with primers harboring a T7 transcription site. 10 µg of recombinant Npl3 (rNpl3) and 1 µg of *in vitro* transcribed rRNA was incubated with 15 µl of Protein G-sepharose beads (GE Healthcare) conjugated to a specific Npl3-antibody for 1 h at 4°C in RNA-binding buffer supplemented with protease inhibitor cocktails (Sigma-Aldrich (Nr. P8215) and Roche Applied Science (Nr. 11873580001)). Upon immunoprecipitation, beads were washed 5 times with RNA-binding buffer and RNA was eluted in 100 µl DEPC-treated ddH<sub>2</sub>O during incubation at 65°C for 10 minutes. The RNA eluate was purified via phenol-chloroform extraction and ethanol precipitation and it was finally eluted in 10 µl of DEPC-treated ddH<sub>2</sub>O. Binding of the 25S, 5.8S or 18S rRNA fragments was analyzed by using RT-PCR with the specific primer pairs HK986/HK674, HK985/HK688 and HK983/HK666.

#### ***In vivo* RNA co-immunoprecipitation**

Yeast cells were grown at 25°C in selective medium to a density of ~ 3 x 10<sup>7</sup> cells/ml. The cells were collected, washed once with 1 x TBS and resuspended in 700 µl RNA-binding buffer. One cell volume of glass beads and protease inhibitor cocktails (Sigma-Aldrich (Nr. P8215) and Roche Applied Science (Nr. 11873580001)) were added. Cells were lysed by vigorous vortexing for 30 sec and 4 m/s using the FastPrep-24 instrument (MP Biomedicals). For DNaseI digestion 700 µl lysate was incubated with 15 µl DNaseI (Qiagen, 40 Kunitz units) at 30°C for 30 min. The co-immunoprecipitation was performed at 4°C for 4 h by incubating lysates with 20 µl Protein G sepharose beads conjugated to monoclonal GFP-antibody (Santa Cruz). The beads were washed five times with RNA-binding buffer and associated RNA was eluted in 100 µl DEPC treated ddH<sub>2</sub>O during incubation at 65°C for 10 min. The RNA eluate was purified via phenol-chloroform extraction and ethanol precipitation. RNA was finally eluted in 10 µl of DEPC treated ddH<sub>2</sub>O and used for qRT-PCR.

#### **Reverse transcription (RT) and quantitative PCR (qPCR)**

1 µg of the RNA eluate from the *in vivo* RNA-co IP experiments was reverse

transcribed using nonamer primers and the Omniscript kit (Qiagen). With the Rotor-Gene™ SYBR Green PCR kit (Qiagen) and a primer concentration of 0,2 µM PCR reactions were conducted following the manufacturers instruction. qRT-PCR was performed in a Rotor-Gene® qPCR machine (Qiagen, Hilden, Germany) for 40 cycles at an annealing temperature of 60°C. All amplifications were performed in triplicates and three biological replicates. The triplicate mean values were calculated according to the  $\Delta\Delta C_t$  quantification method using the untagged wildtype control as a reference for normalization.

### **rRNA *in situ* hybridization**

For synthesis of DIG-UTP labeled rRNA probes, 250 ng purified PCR templates (HK671/HK975 for 25S rRNA and HK667/HK976 for 18S rRNA) were generated including a T7 transcription site on an antisense strand. *In vitro* transcription of the antisense RNA was performed using T7 RNA Polymerase (Fermentas) and DIG-UTP RNA labeling Mix (Roche) according to the standard protocol. DIG labeled antisense transcripts were precipitated with 1/4<sup>th</sup> 4 M LiCl, 1 µl glycogen and 2.5 Vol. EtOH and resuspended in 0,5 x TE/formamide/hybmix (50% formamide, 5 x SSC, 5 x Denhardts, 250 µg/ml tRNA, 500 µg/ml salmon sperm DNA, 50 µg/ml heparin, 2,5 mM EDTA pH8.0, 0,1% Tween-20). For rRNA *in situ* hybridization cells were grown to  $2 \times 10^7$  cell/ml at 25°C and shifted to 37°C for the indicated time. Cells were fixed by adding formaldehyde to a final concentration of 4% and incubated for 1 h at 37°C. Cells were collected and washed twice with 0,1 M phosphate buffer pH6.5 and once with P-solution. Cells were zymolase treated, permeabilized and then prehybridized with hybmix for 1 h on a polylysine coated slide as described in (Krebber et al. 1999). After hybridization over night at 37°C with the respective digoxigenin-labeled rRNA probe, cells were washed with 0,5 to 2 x SSC/50% deionized formamide. Cells were blocked in antibody blocking buffer for 1 h. A sheep anti-digoxigenin Fab-FITC antibody (Roche) was used at a 1:200 dilution and incubated over night at 37°C. After washing with Aby wash I buffer, nuclei were stained with DAPI as described in (Krebber et al. 1999). Microscopy studies were performed with a Leica AF6000 microscope

and pictures were obtained by using the Hamamatsu 1394 ORCA-ERA camera and the LAS AF 1.6.2 software (Leica).

### **Sucrose gradient experiments**

Cells were grown in selective media to log-phase at 25°C. After a temperature shift for 90 min to 37°C the cells were incubated with 200 µg/ml cycloheximide for 20 min on ice. Every following step was done on ice or 4°C. Cells were lysed in lysis buffer (20 mM Tris pH7.4, 20 mM KCl, 5 mM MgCl<sub>2</sub>, 200 µg/ml cycloheximide, 12 mM mercaptoethanol, Roche protease inhibitor without EDTA) by adding glass beads and vortexing for 20 sec using the FastPrep®-24 (MP Biomedicals). Crude extracts were centrifuged for 15 min at 16000 x g. The supernatant (each sample 800 µg total protein) was loaded onto a 6% - 48% linear sucrose gradient (20 mM Tris pH7.4, 20 mM KCl, 5 mM MgCl<sub>2</sub>). After centrifuging for 4 h at 36000 rpm in Beckman SW40 rotor, the gradient was fractionated and absorbance at 254 nm was measured.

### ***In vitro* protein-protein binding**

Gluthatione Sepharose™ 4B beads (GE Healthcare) were equilibrated for 1 h in binding-buffer (20 mM HEPES-KOH pH6.8, 150 mM KOAc, 2 mM Mg[OAc]<sub>2</sub>, 0,1% Tween 20, 5% glycerol, 2 mM DTT, protease inhibitor cocktail without EDTA from Roche Applied Science) and blocked with 1% (w/v) BSA. Afterwards beads were washed 4 times with binding-buffer. 10 µg GST-GLFG<sub>Nup116</sub> was immobilized on 30 µl Gluthatione Sepharose™ 4B beads (GE Healthcare) and incubated on a rotator for 1 h at 4°C in a total volume of 400 µl binding-buffer. One sample without bound GST-protein served as a negative control. 10 µg of recombinant purified Npl3 was mixed with 15 µg *E. coli* lysate and added to all samples followed by an incubation for 1,5 h under continuous end over end rotation at 4°C. The beads were washed 4 times with binding-buffer by low speed centrifugation (600 x g). Beads were mixed with 2 x SDS sample loading buffer and separated on 10% (w/v) SDS-PAGEs. Bound GST protein was detected with anti-GST antibody at 1:3000 dilution and co-purified Npl3 with anti-Npl3 antibody (1:5000).

## SUPPLEMENTARY TABLES

Table S1. Yeast strains

| Number | Name    | Genotype                                                                                                                                                                                                       | Source                 |
|--------|---------|----------------------------------------------------------------------------------------------------------------------------------------------------------------------------------------------------------------|------------------------|
| HKY36  | FY86    | <i>MAT<math>\alpha</math> ura3-52 leu2<math>\Delta</math>1 his3-200</i>                                                                                                                                        | Fred Winston           |
| HKY157 | PSY1641 | <i>MAT<math>\alpha</math> ura3-1 leu2 his3 lys2 ade2 ade3 npl3::HIS3 + p CEN URA3 NPL3</i>                                                                                                                     | Lee et al., 1996       |
| HKY158 | PSY906  | <i>MAT<math>\alpha</math> ura3-1 leu2 his3 lys2 ade2 ade3 npl3::HIS3 + p CEN LEU2 npl3-1</i>                                                                                                                   | Lee et al., 1996       |
| HKY159 | PSY907  | <i>MAT<math>\alpha</math> ura3-1 leu2 his3 lys2 ade2 ade3 npl3::HIS3 + p CEN LEU2 npl3-3</i>                                                                                                                   | Lee et al., 1996       |
| HKY160 | PSY908  | <i>MAT<math>\alpha</math> ura3-1 leu2 his3 lys2 ade2 ade3 npl3::HIS3 + p CEN LEU2 npl3-17</i>                                                                                                                  | Lee et al., 1996       |
| HKY161 | PSY912  | <i>MAT<math>\alpha</math> ura3-1 leu2 his3 lys2 ade2 ade3 npl3::HIS3 + p CEN LEU2 npl3-41</i>                                                                                                                  | Lee et al., 1996       |
| HKY280 | FSY978  | <i>MAT<math>\alpha</math> ura3-52 leu2 trp1 pep4-3 pre1-407 prb1-1122</i>                                                                                                                                      | Zenklusen et al., 2001 |
| HKY380 | Y04268  | <i>MAT<math>\alpha</math> ura3<math>\Delta</math>0 leu2<math>\Delta</math>0 his3<math>\Delta</math>1 met15<math>\Delta</math>0 npl3::kanMX4</i>                                                                | Euroscarf              |
| HKY381 | BY4742  | <i>MAT<math>\alpha</math> ura3<math>\Delta</math>0 leu2<math>\Delta</math>0 his3<math>\Delta</math>1 lys2<math>\Delta</math>0</i>                                                                              | Euroscarf              |
| HKY611 |         | <i>MAT<math>\alpha</math> ura3 leu2 his3 npl3::kanMX4 rat7-1</i>                                                                                                                                               | this study             |
| HKY705 |         | <i>MAT<math>\alpha</math> ura3 leu2 his3 trp1 rix1-1</i>                                                                                                                                                       | Bassler et al., 2001   |
| HKY725 |         | <i>MAT<math>\alpha</math> ura3<math>\Delta</math>0 leu2<math>\Delta</math>0 his3<math>\Delta</math>0 lys2<math>\Delta</math>0 xpo1::kanMX4 + p CEN HIS3 xpo1-1</i>                                             | this study             |
| HKY802 |         | <i>MAT<math>\alpha</math> ura3<math>\Delta</math>0 leu2<math>\Delta</math>0 his3<math>\Delta</math>1 lys2<math>\Delta</math>0 RPL25-3xmyc:HIS3MX6</i>                                                          | this study             |
| HKY805 |         | <i>MAT<math>\alpha</math> ura3<math>\Delta</math>0 leu2<math>\Delta</math>0 his3<math>\Delta</math>1 met15<math>\Delta</math>0 npl3::kanMX4 RPL25-3xmyc:HIS3MX6</i>                                            | this study             |
| HKY822 |         | <i>MAT<math>\alpha</math> ura3<math>\Delta</math>0 leu2<math>\Delta</math>0 his3<math>\Delta</math>1 npl3::kanMX4 xpo1::kanMX4 + p CEN URA3 NPL3 + p CEN HIS3 xpo1-1</i>                                       | this study             |
| HKY890 |         | <i>MAT<math>\alpha</math> ura3 leu2 his3 trp1 ade2 mtr2::HIS3 + p CEN TRP1 mtr2-21 + p CEN URA3 MTR2</i>                                                                                                       | Bassler et al., 2001   |
| HKY892 |         | <i>MAT<math>\alpha</math> ura3 leu2 his3 trp1 ade2 mtr2::HIS3 + p CEN TRP1 mtr2-33 + p CEN URA3 MTR2</i>                                                                                                       | Bassler et al., 2001   |
| HKY894 |         | <i>MAT<math>\alpha</math> ura3 leu2 his3 lys2 trp1 nmd3::kanMX4 + p CEN TRP1 nmd3-2 + p CEN URA3 NMD3</i>                                                                                                      | Bassler et al., 2001   |
| HKY896 |         | <i>MAT<math>\alpha</math> ura3 leu2 his3 trp1 npl3::kanMX4 mtr2::HIS3 + p CEN TRP1 mtr2-21 + p CEN URA3 MTR2</i>                                                                                               | this study             |
| HKY897 |         | <i>MAT<math>\alpha</math> ura3 leu2 his3 trp1 npl3::kanMX4 mtr2::HIS3 + p CEN TRP1 mtr2-33 + p CEN URA3 MTR2</i>                                                                                               | this study             |
| HKY904 |         | <i>MAT<math>\alpha</math> ura3<math>\Delta</math>0 leu2<math>\Delta</math>0 his3<math>\Delta</math>1 lys2<math>\Delta</math>0 trp1::kanMX4 npl3::kanMX4 nmd3::kanMX4 + p CEN TRP1 nmd3-2 + p CEN URA3 NMD3</i> | this study             |



|         |                                                                                                         |                     |
|---------|---------------------------------------------------------------------------------------------------------|---------------------|
| HKY906  | <i>MATα ura3Δ0 leu2Δ0 his3Δ0 trp1::kanMX4 mtr2::kanMX4 + p CEN TRP1 mtr2-21 + p CEN URA3 MTR2</i>       | this study          |
| HKY908  | <i>MATα ura3Δ0 leu2Δ0 his3Δ1 trp1::kanMX4 mtr2::kanMX4 + p CEN TRP1 mtr2-33 + p CEN URA3 MTR2</i>       | this study          |
| HKY914  | <i>MATα ura3Δ0 leu2Δ0 his3Δ1 lys2Δ0 trp1::kanMX4 nmd3::kanMX4 + p CEN TRP1 nmd3-2 + p CEN URA3 NMD3</i> | this study          |
| HKY951  | <i>MATα ura3 leu2 his3 trp1 RIX1-GFP:HISMX6</i>                                                         | Nissan et al., 2004 |
| HKY953  | <i>MATα ura3 leu2 his3 trp1 ARX1-TAP:TRP1</i>                                                           | Nissan et al., 2004 |
| HKY1004 | <i>MATα ura3Δ0 leu2Δ0 his3Δ1 met15Δ0 PRP43-TAP:HISMX6</i>                                               | Open Biosystems     |
| HKY1061 | <i>MATα ura3Δ0 leu2Δ0 his3Δ1 met15Δ0 NUP60-TAP:HISMX6</i>                                               | Open Biosystems     |
| HKY1083 | <i>MATα ura3Δ0 leu2Δ0 his3Δ1 met15Δ0 RPS9A-GFP:HISMX6</i>                                               | Invitrogen          |
| HKY1092 | <i>MATα ura3Δ0 leu2Δ0 his3Δ1 met15Δ0 nup60::kanMX4</i>                                                  | Euroscarf           |
| HKY1096 | <i>MATα ura3Δ0 leu2Δ0 his3Δ1 npl3::kanMX4 PRP43-TAP:HISMX6</i>                                          | this study          |
| HKY1097 | <i>MATα ura3Δ0 leu2Δ0 his3Δ1 npl3::kanMX4 nup60::kanMX4 + p CEN URA3 NPL3</i>                           | this study          |
| HKY1098 | <i>MATα his3Δ leu2Δ ura3Δ rat7-1</i>                                                                    | this study          |
| HKY1099 | <i>MATα his3Δ1 leu2Δ0 ura3Δ0 nmd3::kanMX4 p CEN LEU2 NMD3-GFP</i>                                       | this study          |

---

Table S2. Plasmids

| Number | Name    | Features                               | Source                   |
|--------|---------|----------------------------------------|--------------------------|
| pHK20  |         | <i>CEN LEU2 MEX67-GFP</i>              | Santos-Rosa et al., 1998 |
| pHK26  |         | <i>CEN URA3 NPL3</i>                   | this study               |
| pHK87  | pRS315  | <i>CEN LEU2</i>                        | Sikorski & Hieter, 1989  |
| pHK88  | pRS316  | <i>CEN URA3</i>                        | Sikorski & Hieter, 1989  |
| pHK103 | pRS425  | <i>2<math>\mu</math> LEU2</i>          | Sikorski & Hieter, 1989  |
| pHK104 | pRS426  | <i>2<math>\mu</math> URA3</i>          | Sikorski & Hieter, 1989  |
| pHK195 | pPS1152 | <i>2<math>\mu</math> URA3 NPL3</i>     | Lee et al., 1996         |
| pHK260 |         | <i>2<math>\mu</math> LEU2 RAT8-myc</i> | Snay-Hodge et al., 1998  |
| pHK285 |         | <i>2<math>\mu</math> LEU2 MTR2</i>     | Santos-Rosa et al., 1998 |
| pHK418 | pCS38   | <i>CEN LEU2 GFP-NPL3</i>               | Gilbert et al., 2001     |
| pHK419 | pCS55   | <i>CEN LEU2 GFP-npl3c (npl3-RA8)</i>   | Gilbert et al., 2001     |
| pHK492 | pYM5    | <i>3xmyc-HIS3MX6</i>                   | Knop et al., 1999        |
| pHK493 | pYM6    | <i>9xmyc-klTRP1</i>                    | Knop et al., 1999        |
| pHK526 | pSW304  | <i>GST-GLFG<sub>Nup116</sub></i>       | Iovine & Wente, 1997     |
| pHK697 |         | <i>CEN URA3 RPS2-GFP</i>               | Milkereit et al., 2003   |
| pHK698 |         | <i>CEN URA3 RPL25-GFP</i>              | Gadal et al., 2001       |
| pHK705 |         | <i>CEN TRP1 mtr2-21</i>                | Bassler et al., 2001     |
| pHK706 |         | <i>CEN TRP1 mtr2-33</i>                | Bassler et al., 2001     |
| pHK708 |         | <i>CEN TRP1 nmd3-2</i>                 | Bassler et al., 2001     |
| pHK719 | pAJ410  | <i>2<math>\mu</math> LEU2 NMD3</i>     | Hedges et al., 2005      |
| pHK720 | pAJ538  | <i>CEN LEU2 NMD3-myc</i>               | Hedges et al., 2005      |
| pHK721 | pAJ582  | <i>CEN LEU2 NMD3-GFP</i>               | Hedges et al., 2005      |
| pHK765 |         | <i>CEN URA3 NPL3-GFP</i>               | this study               |
| pHK778 |         | <i>CEN LEU2 9xmyc-NPL3</i>             | this study               |
| pHK845 | pET-15b | 6 x <i>HIS-NPL3</i>                    | this study               |

Table S3. Oligonucleotides

| Number | Sequence                                                               |
|--------|------------------------------------------------------------------------|
| HK181  | 5'-GGATCCTTACCTGGTTGGTGATCTTTC-3'                                      |
| HK495  | 5'-GCTGACTACGATGCTTTGGACATTGCTAACAGAATCGGTTACATTTCGTACGCTGCAGGTCGAC-3' |
| HK496  | 5'-AAAAATTTAAAAATAATATTAATTTATTAATTAACCAATTAGAATCGATGAATTCGAGCTCG-3'   |
| HK553  | 5'-AAAAGGCCTATGGGTGAACAAAAGTTGATTTTC-3'                                |
| HK554  | 5'-TTTAGGCCTTCCGTTCAAGTCTTCTTC-3'                                      |
| HK652  | 5'-CGCGGATCCCATGTCTGAAGCTCAAGAAAC-3'                                   |
| HK653  | 5'-CCTTAGTAACGGCGAGTGAAGCGG-3'                                         |
| HK654  | 5'-GGAATTTACCACCCACTTAGAGCTGC-3'                                       |
| HK655  | 5'-GGTTGATCCTGCCAGTAGTCATATGC-3'                                       |
| HK656  | 5'-CCAGCACAAGGCCATGCGATTC-3'                                           |
| HK663  | 5'-CGCATCGATGAAGAACGCAGCG-3'                                           |
| HK664  | 5'-GCTTAAGTTCAGCGGGTACTCCTACC-3'                                       |
| HK666  | 5'-CTTTAATGATCCTTCCGCAGGTTTC-3'                                        |
| HK667  | 5'-GAAGACTAACTACTGCGAAAGC-3'                                           |
| HK671  | 5'-GTGGGCCATTTTTGGTAAGC-3'                                             |
| HK674  | 5'-GGCTACCTTAAGAGAGTCATAGTTAC-3'                                       |
| HK687  | 5'-AAACTTTCAACAACGGATCTC-3'                                            |
| HK688  | 5'-AAATGACGCTCAAACAGGC-3'                                              |
| HK983  | 5'-TAATACGACTCACTATAGGGGATAGTTATCTGGTTGATCCTGCC-3'                     |
| HK985  | 5'-TAATACGACTCACTATAGGGAAACTTTCAACAACGGATCTC-3'                        |
| HK986  | 5'-TAATACGACTCACTATAGGGCCTTAGTAACGGCGAGTGAAGCGG-3'                     |
| HK975  | 5'-TAATACGACTCACTATAGGGGGCTACCTTAAGAGAGTCATAGTTAC-3'                   |
| HK976  | 5'-TAATACGACTCACTATAGGGCTTTAATGATCCTTCCGCAGGTTTC-3'                    |
| HK979  | 5'-CCCTGCCCTTTGTACACACC-3'                                             |

## References:

- Bassler, J., Grandi, P., Gadal, O., Lessmann, T., Petfalski, E., Tollervey, D., Lechner, J., and Hurt, E. (2001). Identification of a 60S preribosomal particle that is closely linked to nuclear export. *Mol Cell* **8**, 517-529.
- Brachmann, C.B., Davies, A., Cost, G.J., Caputo, E., Li, J., Hieter, P., and Boeke, J.D. (1998). Designer deletion strains derived from *Saccharomyces cerevisiae* S288C: a useful set of strains and plasmids for PCR-mediated gene disruption and other applications. *Yeast (Chichester, England)* **14**, 115-132.
- Christianson, T.W., Sikorski, R.S., Dante, M., Shero, J.H., and Hieter, P. (1992). Multifunctional yeast high-copy-number shuttle vectors. *Gene* **110**, 119-122.
- Gadal, O., Strauss, D., Kessler, J., Trumpower, B., Tollervey, D., and Hurt, E. (2001). Nuclear export of 60s ribosomal subunits depends on Xpo1p and requires a nuclear export sequence-containing factor, Nmd3p, that associates with the large subunit protein Rpl10p. *Molecular and cellular biology* **21**, 3405-3415.
- Gilbert, W., Siebel, C.W., and Guthrie, C. (2001a). Phosphorylation by Sky1p promotes Npl3p shuttling and mRNA dissociation. *RNA (New York, NY)* **7**, 302-313.
- Gilbert, W., Siebel, C.W., and Guthrie, C. (2001b). Phosphorylation by Sky1p promotes Npl3p shuttling and mRNA dissociation. *RNA* **7**, 302-313.
- Hedges, J., West, M., and Johnson, A.W. (2005). Release of the export adapter, Nmd3p, from the 60S ribosomal subunit requires Rpl10p and the cytoplasmic GTPase Lsg1p. *EMBO J* **24**, 567-579.
- Hurt, E., Luo, M.J., Rother, S., Reed, R., and Strasser, K. (2004). Cotranscriptional recruitment of the serine-arginine-rich (SR)-like proteins Gbp2 and Hrb1 to nascent mRNA via the TREX complex. *Proc Natl Acad Sci U S A* **101**, 1858-1862.
- Knop, M., Siegers, K., Pereira, G., Zachariae, W., Winsor, B., Nasmyth, K., and Schiebel, E. (1999). Epitope tagging of yeast genes using a PCR-based strategy: more tags and improved practical routines. *Yeast* **15**, 963-972.
- Krebber, H., Taura, T., Lee, M.S., and Silver, P.A. (1999). Uncoupling of the hnRNP Npl3p from mRNAs during the stress-induced block in mRNA export. *Genes Dev* **13**, 1994-2004.
- Krebber, H., Taura, T., Lee, M.S., and Silver, P.A. (1999). Uncoupling of the hnRNP Npl3p from mRNAs during the stress-induced block in mRNA export. *Genes Dev* **13**(15), 1994-2004.
- Lee, M.S., Henry, M., and Silver, P.A. (1996). A protein that shuttles between the nucleus and the cytoplasm is an important mediator of RNA export. *Genes Dev* **10**, 1233-1246.
- Lei, E.P., Krebber, H., and Silver, P.A. (2001). Messenger RNAs are recruited for nuclear export during transcription. *Genes Dev* **15**, 1771-1782.
- Milkereit, P., Gadal, O., Podtelejnikov, A., Trumtel, S., Gas, N., Petfalski, E., Tollervey, D., Mann, M., Hurt, E., and Tschochner, H. (2001). Maturation and intranuclear transport of pre-ribosomes requires Noc proteins. *Cell* **105**, 499-509.
- Milkereit, P., Strauss, D., Bassler, J., Gadal, O., Kuhn, H., Schutz, S., Gas, N., Lechner, J., Hurt, E., and Tschochner, H. (2003). A Noc complex specifically

involved in the formation and nuclear export of ribosomal 40 S subunits. *J Biol Chem* 278, 4072-4081.

Nissan, T.A., Galani, K., Maco, B., Tollervey, D., Aebi, U., and Hurt, E. (2004). A pre-ribosome with a tadpole-like structure functions in ATP-dependent maturation of 60S subunits. *Mol Cell* 15, 295-301.

Rose, A.B., and Broach, J.R. (1990). Propagation and expression of cloned genes in yeast: 2-microns circle- based vectors. *Methods Enzymol* 185, 234-279.

Santos-Rosa, H., Moreno, H., Simos, G., Segref, A., Fahrenkrog, B., Pante, N. and Hurt, E. (1998). Nuclear mRNA export requires complex formation between Mex67p and Mtr2p at the nuclear pores. *Mol Cell Biol* 18, 6826-6838.

Shen, E.C., Henry, M.F., Weiss, V.H., Valentini, S.R., Silver, P.A., and Lee, M.S. (1998). Arginine methylation facilitates the nuclear export of hnRNP proteins. *Genes Dev* 12, 679-691.

Snay-Hodge C.A., Colot H.V., Goldstein A.L., Cole C.N. (1998). Dbp5p/Rat8p is a yeast nuclear pore protein essential for RNA export (1998). *EMBO J.* 17(9), 2663-76.

Taura, T., Krebber, H., and Silver, P.A. (1998). A member of the Ran-binding protein family, Yrb2p, is involved in nuclear protein export. *Proc Natl Acad Sci U S A* 95, 7427-7432.

Zenklusen D., Vinciguerra P., Strahm Y., Stutz F. (2001) The yeast hnRNP-Like proteins Yra1p and Yra2p participate in mRNA export through interaction with Mex67p. *Mol Cell Biol* 21(13): 4219-4232
